# Supplementary material for: Development of novel GnRH and Tat48–60 based luminescent probes with enhanced cellular uptake and bioimaging profile
Source: Royal Society of Chemistry journal article supplement (doi:10.1039/d1dt00060h), 2021-01-01
Supplement: d1dt00060h1.pdf [file d1dt00060h1.pdf]

## Supporting Information

### Development of novel GnRH and Tat<sup>48-60</sup> based luminescent agents with enhanced cellular uptake and bioimaging properties

Anastasia Kougioumtzi<sup>1</sup>, Maria V. Chatziathanasiadou<sup>2</sup>, Eirinaios I. Vrettos<sup>2</sup>, Nisar Sayyad<sup>2</sup>, Mariana Sakka<sup>2</sup>, Panagiotis Stathopoulos<sup>2</sup>, Michalis D. Mantzaris<sup>1</sup>, Ab Majeed Ganai<sup>5</sup>, Rajshekhar Karpoormath<sup>5</sup>, Georgios Vartholomatos<sup>3</sup>, Vassilios Tsikaris<sup>2</sup>, Theodore Lazarides<sup>4</sup>, Carol Murphy<sup>1</sup>, Andreas G. Tzakos<sup>\*2,6</sup>

<sup>1</sup>Institute of Molecular Biology & Biotechnology, Foundation of Research and Technology-Hellas, Department of Biomedical Research, University Campus, 45110 Ioannina, Greece

<sup>2</sup>University of Ioannina, Department of Chemistry, Section of Organic Chemistry and Biochemistry, 45110, Ioannina, Greece

<sup>3</sup>Hematology Laboratory, Unit of Molecular Biology, University Hospital of Ioannina, Ioannina, 45110 Greece

<sup>4</sup>Laboratory of Inorganic Chemistry, Department of Chemistry, Aristotle University of Thessaloniki, 54124 Thessaloniki, Greece

<sup>5</sup>Department of Pharmaceutical Chemistry, Discipline of Pharmaceutical Sciences, College of Health Sciences, University of KwaZulu-Natal (Westville), Durban 4000, South Africa

<sup>6</sup>University Research Center of Ioannina (URCI), Institute of Materials Science and Computing, Ioannina, Greece

#### \*Corresponding author

Andreas G. Tzakos, Department of Chemistry, University of Ioannina, 45110, Greece; Tel.: +30 2651008387, email: atzakos@uoi.gr

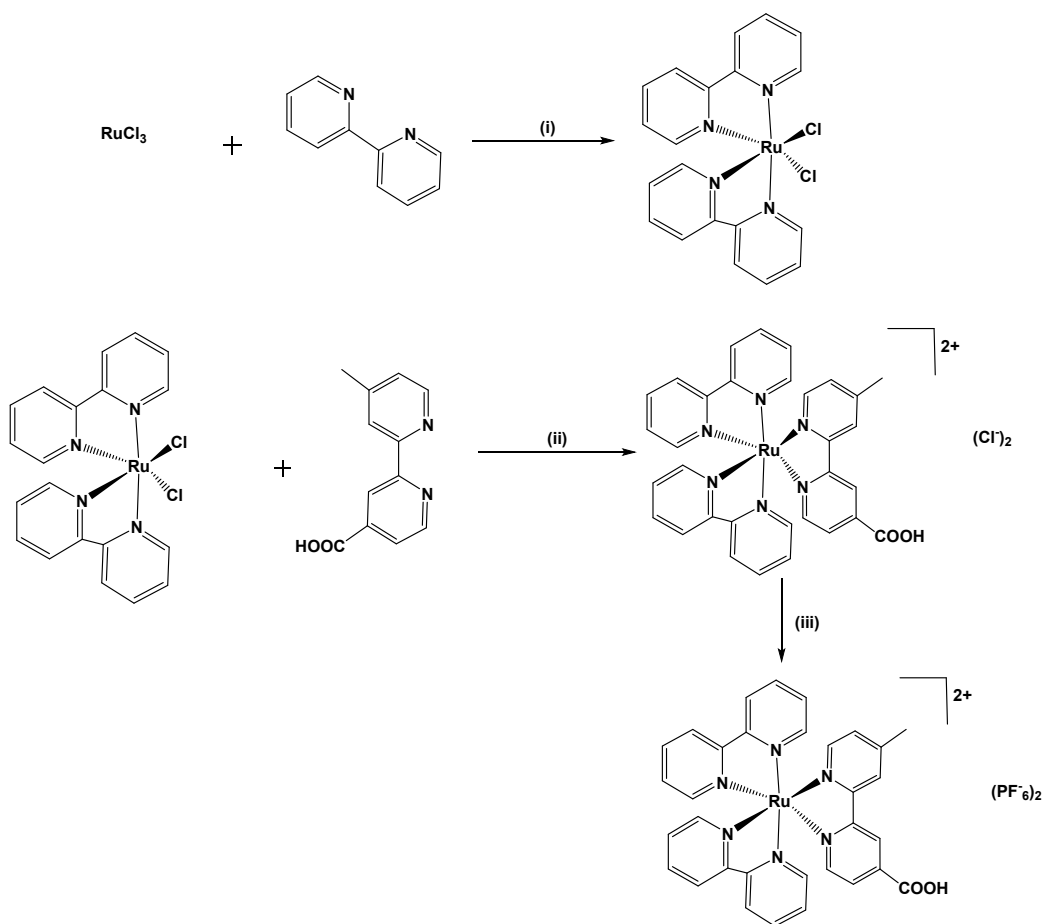

**Scheme S1:** Synthesis of the chromophore group  $[\text{Ru}(\text{bipy})_2(\text{mcb})](\text{PF}_6)_2$ . **(i)** LiCl in DMF; **(ii)** MeOH; **(iii)**  $\text{NH}_4\text{PF}_6$ .

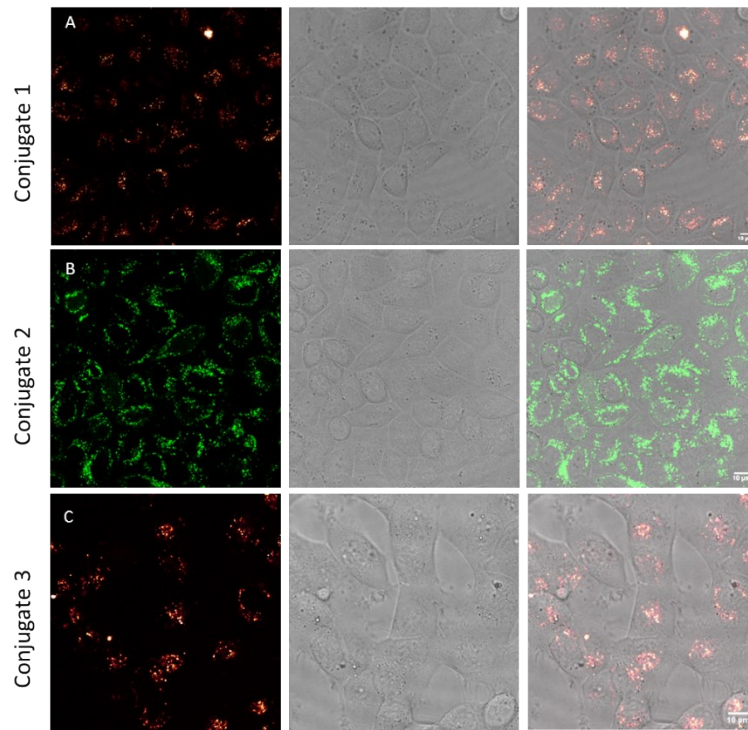

**Figure S1. Cellular uptake of the conjugates 1-3 by live cell confocal microscopy after acid stripping.** Before live cell microscopy analysis, the cells were washed 3 times with Phosphate Buffered Saline (PBS), acid washes were performed twice with plain medium (pH 2) and 1 mL of fresh medium was added to the dishes. **A.** Fluorescence analysis of HeLa cells incubated at 37 °C for 2 hours with 25 µM of **conjugate 1**. **B.** Fluorescence analysis of HeLa cells incubated at 37 °C for 2 hours with 25 µM of **conjugate 2**. **C.** Fluorescence analysis of T24 cells incubated at 37 °C for 24 hours with 25 µM of **conjugate 3**. Samples were analyzed with LSCM using a Leica Sp5 confocal microscope. Representative fluorescence and bright-field images are shown. In merge images Scale bar = 10 µM.

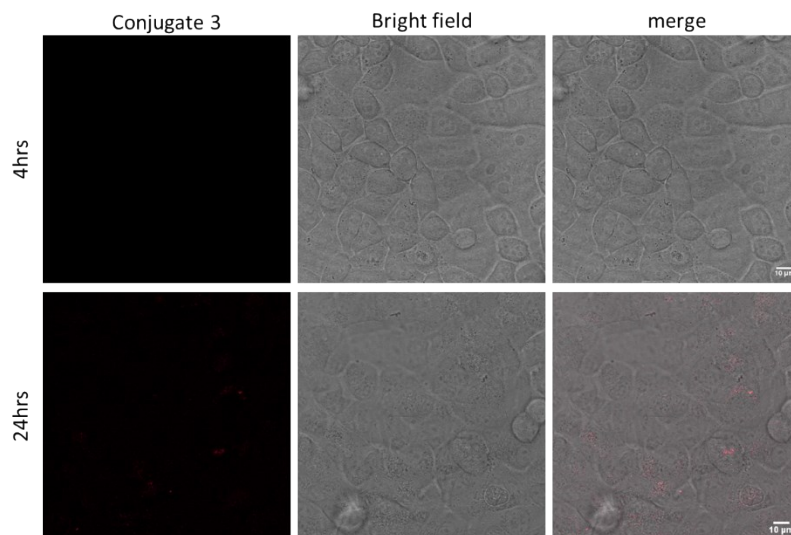

**Figure S2. Cellular uptake of the conjugate 3 in HeLa cells by live cell confocal microscopy.** Live-cell microscopy on HeLa cells incubated at 37 °C for 4 hours and 24 hours with 25 µM of **conjugate 3**. Samples were analyzed with LSCM using a Leica Sp5 confocal microscope. Representative fluorescence and bright-field images are shown. In merge images Scale bar = 10 µM.

### **Photophysical characterization**

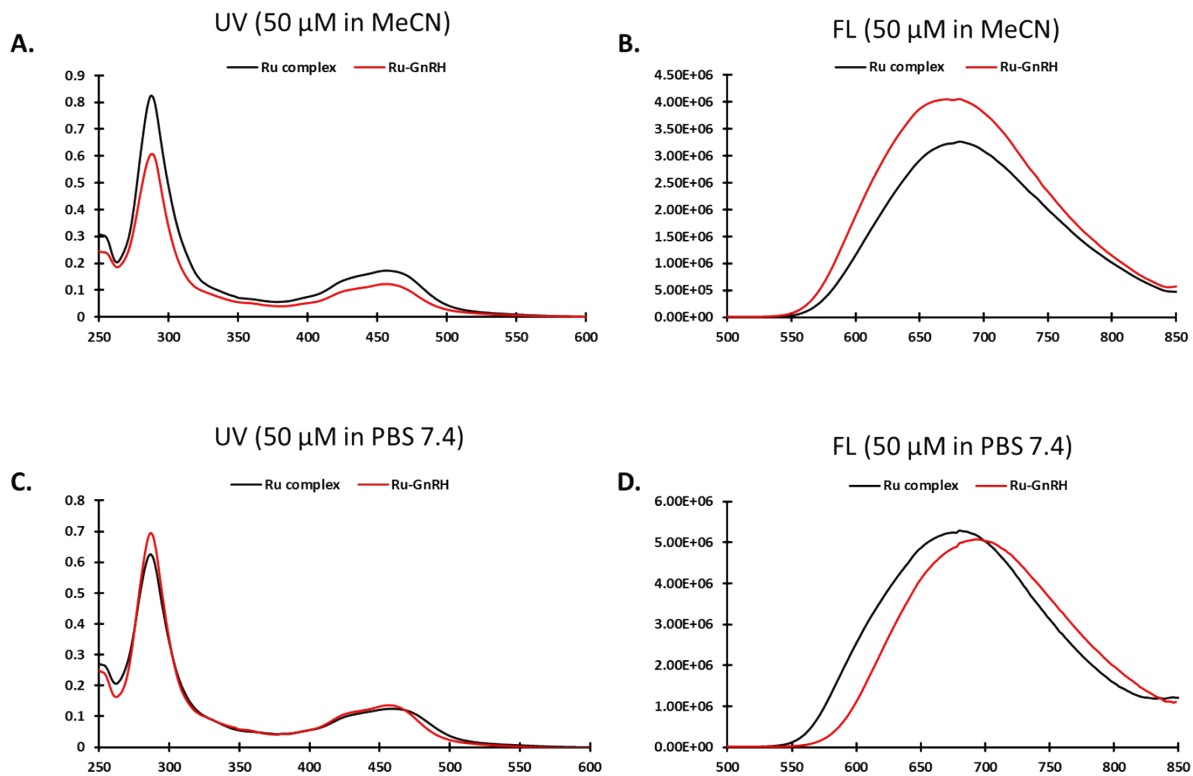

**Figure S3.** Photophysical characterization of Ru complex  $[\text{Ru}(\text{bipy})_2(\text{mcb})](\text{PF}_6)_2$  and Ru-GnRH (**conjugate 3**) via **A.** UV in MeCN, **B.** Fluorescence in MeCN, **C.** UV in PBS pH 7.4 and **D.** Fluorescence in PBS pH 7.4. The measurements were conducted at 298 K using 50  $\mu\text{M}$  samples.

### Stability in physiological conditions

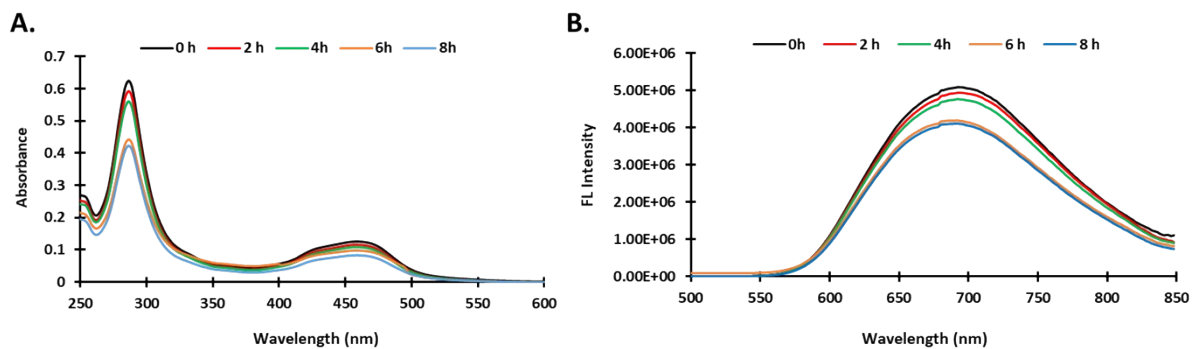

**Figure S4.** Stability of **conjugate 3** in PBS pH=7.4 over time assessed via **A.** UV and **B.** Fluorescence spectroscopy. The measurements were conducted at 298 K using 50  $\mu$ M samples.

### Videos of photostability of the conjugates after continuous laser scanning

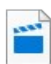

Video 1.avi

**Video 1. Conjugate 2:** HeLa cells were incubated at 37 °C for 2 hours with 25  $\mu$ M **conjugate 2** and images were taken every 5 seconds for 5 minutes by live confocal microscopy. Video was generated using ImageJ software, Playback acceleration 50x.

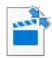

Video 2.avi

**Video 2. Conjugate 1:** HeLa cells were incubated at 37 °C for 2 hours with 25  $\mu$ M **conjugate 1** and images were taken every 5 seconds for 5 minutes by live confocal microscopy. Video was generated using ImageJ software, Playback acceleration 50x.

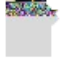

Video 3.avi

**Video 3. Conjugate 3:** T24 cells were incubated at 37 °C for 2 hours with 25  $\mu$ M of **conjugate 3**, and images were taken every 5 seconds for 9 minutes by live confocal microscopy. Video was generated using ImageJ software, Playback acceleration 90x
